# Supplementary material
Source: MDPI journal article supplement (https://www.mdpi.com/2673-7167/3/1/12)
Supplement: s1 [file s1]

## Supplementary Materials

for

# Measurement Precision and Thermal and Absorption Properties of Nanostructures in Aqueous Solutions by Transient and Steady-State Thermal-Lens Spectrometry

Vladislav R. Khabibullin,<sup>1</sup> Liliya O. Usoltseva,<sup>1</sup> Polina A. Galkina,<sup>1</sup> Viktoriya R. Galimova,<sup>1</sup> Dmitry S. Volkov,<sup>1</sup> Ivan V. Mikheev,<sup>1\*</sup> and Mikhail A Proskurnin<sup>1\*</sup>

Analytical Chemistry Division, Chemistry Department, M.V. Lomonosov Moscow State University, d. 1, str. 3, Lenin Hills, Moscow, GSP-1 V-234, 119991, Russia

\* Correspondence: mikheev.ivan@gmail.com; (I.V.M.); proskurnin@gmail.com (M.A.P.); Tel.: +7-495-939-15-68 (I.V.M.).

### Table of contents

|                                                                                                    |   |
|----------------------------------------------------------------------------------------------------|---|
| Figures.....                                                                                       | 2 |
| Tables .....                                                                                       | 5 |
| Procedures .....                                                                                   | 6 |
| Procedure S1. Determination of solubility constants of metal iodides [2]. .....                    | 6 |
| Procedure S2. Preparation of solutions $\text{Co}(\text{NO}_3)_2 \times 6\text{H}_2\text{O}$ ..... | 6 |
| Procedure S3. Preparation of gentian violet solutions. ....                                        | 6 |
| Procedure S4. Preparation of ferroin solutions. ....                                               | 7 |
| Procedure S5. Preparation of nanodiamond solutions for spectrophotometric measurements. ....       | 7 |
| Procedure S6. Aqueous solutions of surfactants. ....                                               | 7 |
| References .....                                                                                   | 8 |

## Figures

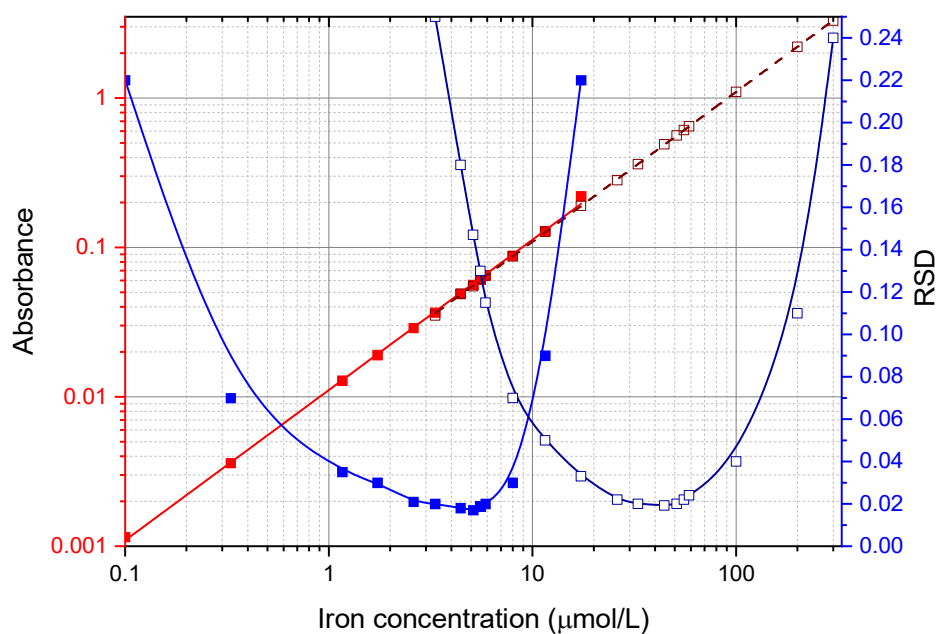

**Figure S1.** The linear calibration ranges of absorbance (red lines, straight; correspond to the left log-scale Y-axis) and experimental RSDs of measurements (blue lines, splined; correspond to the right linear Y-axis) for iron(II) tris(1,10-phenanthroline) by thermal lensing (light color curves) recalculated to absorbance and optical absorption measurements (dark-color curves) [1].

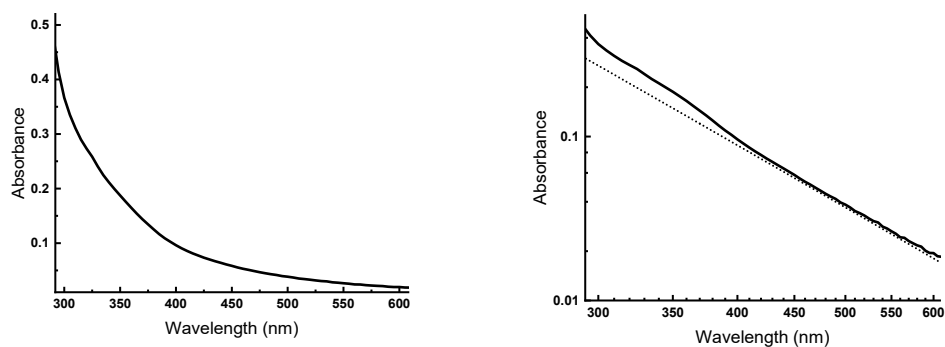

**Figure S2.** Absorption spectrum of colloidal silicon oxide of the AM grade, 3.2 vol.%,  $l = 10.0$  mm. Spectra are presented in the usual coordinates (left) and in the bilogarithmic coordinates (on the right, the strokes depict the Rayleigh scattering  $\lambda^{-4}$ ).

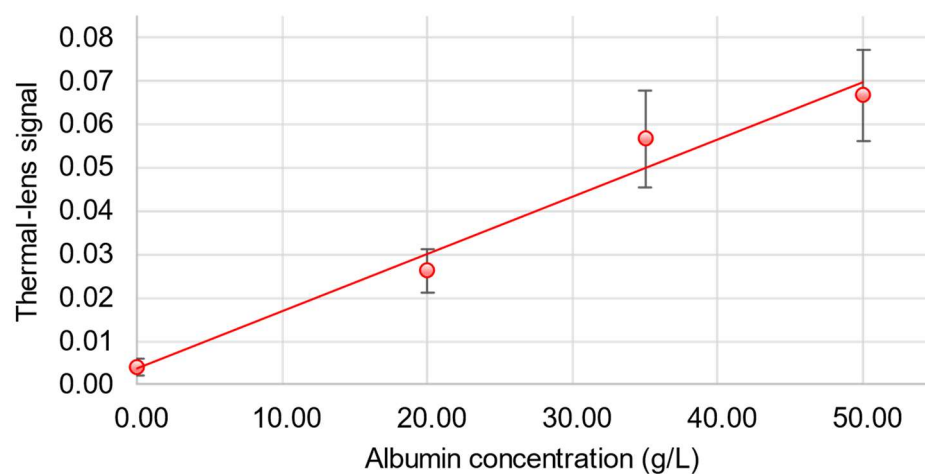

**Figure S3.** Dependence of the thermal lens signal on the concentration of albumin in the solution of 0.9% NaCl; Setup, TLS-60; excitation wavelength, 514.5 nm; excitation power, 40 mW.

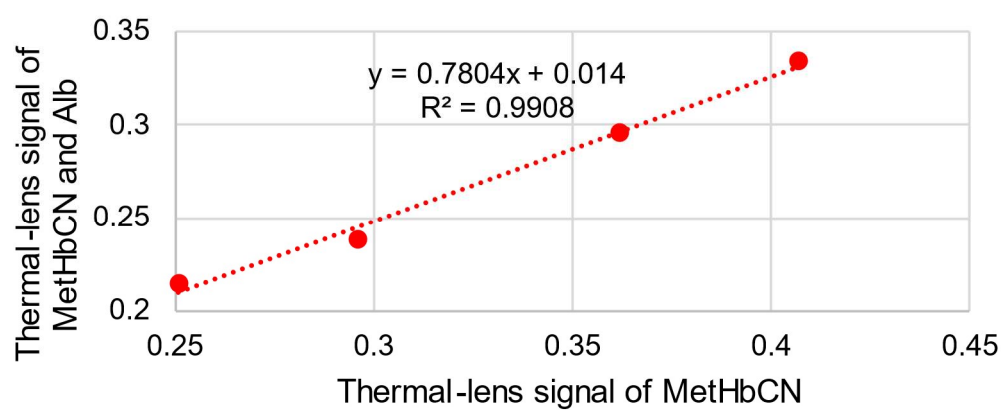

**Figure S4.** Correlation of the thermal-lens signal of mixtures of hemoglobin cyanide and albumin on the sum of thermal-lens signals of their individual solutions with the same concentrations. Setup, TLS-300; excitation wavelength, 445 nm; excitation power, 69 mW.

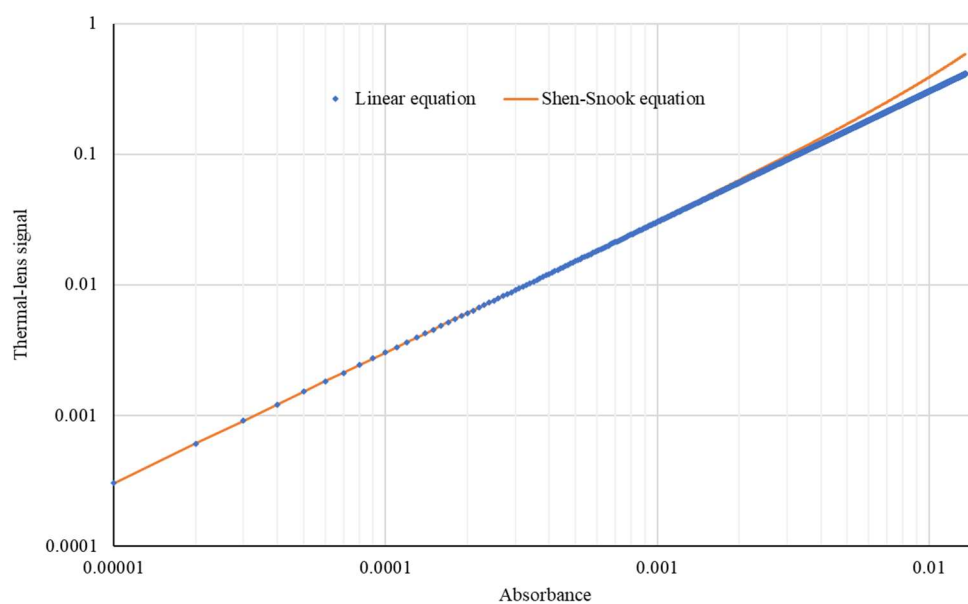

**Figure S5.** Log-log plot of the thermal-lens signal calculated by the linear model, Eq. (3) and Shen-Snook equation, Eq. (2), on sample absorbance, water. Setup, TLS-60; Geometry constant  $B$ , Eq. (4), 0.72; Excitation power, 200 mW.

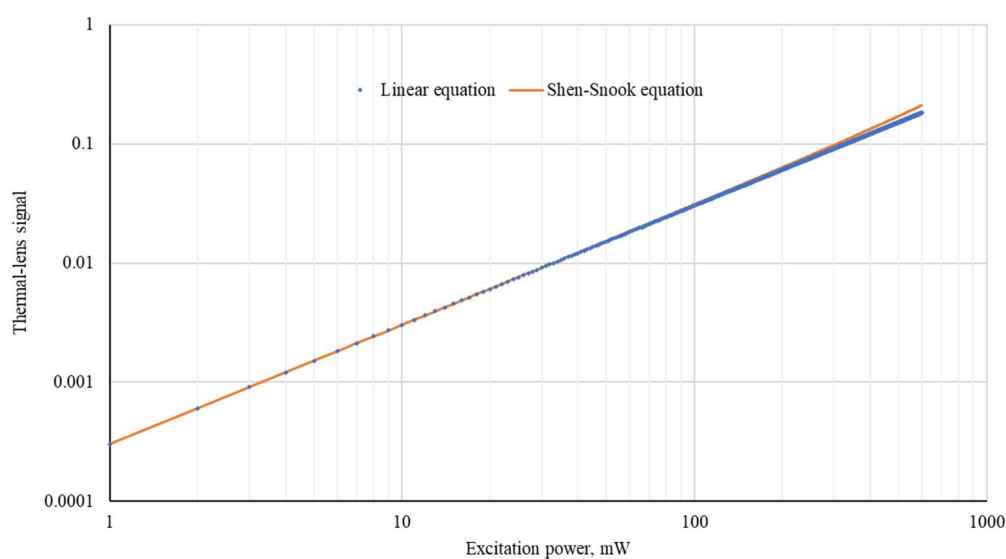

**Figure S6.** Log-log plot of the thermal-lens signal calculated by the linear model, Eq. (3) and Shen-Snook equation, Eq. (2), on the excitation power, water. Setup, TLS-60; Geometry constant  $B$ , Eq. (4), 0.72; Sample absorbance, 0.002.

## Tables

**Table S1.** Silicon oxide LUDOX grades AM, SM-30, CL-X, TMA, HS-40, TM-50, GRACE, USA, the characteristics provided by the manufacturer

| Parameter                                          | Brand    |       |      |      |       |       |
|----------------------------------------------------|----------|-------|------|------|-------|-------|
|                                                    | AM       | SM-30 | CL-X | TMA  | HS-40 | TM-50 |
| Particle charge                                    | Negative |       |      |      |       |       |
| Average particle diameter, nm                      | 12       | 7     | 22   | 22   | 12    | 34    |
| Silica gel (according to SiO <sub>2</sub> ), % w/w | 30       | 30    | 45   | 34   | 40    | 50    |
| pH (25°C)                                          | 8.9      | 10.0  | 9.1  | 9.0  | 9.7   | 9.0   |
| Specific surface area, m <sup>2</sup> /g           | 220      | 345   | 130  | 140  | 220   | 140   |
| Titrated alkali (as Na <sub>2</sub> O), % w/w      | 0.24     | 0.56  | 0.19 | 0.21 | 0.41  | 0.5   |

**Table S2.** Selection of coefficients of functions describing the formation and dissipation of a thermo-optical element in thermal lens experiment, MetHbCN, 6.0  $\mu\text{mol/L}$  ( $P = 0.95$ ). Setup, TLS-60; excitation wavelength, 514.5 nm; excitation power, 40.0 mW

| Equation          | $y = y_0 + ae^{-bx}$  |                     |                 | $y = y_0 + ae^{-bx} + fe^{-gx}$ |                     |                 |                    |                 |
|-------------------|-----------------------|---------------------|-----------------|---------------------------------|---------------------|-----------------|--------------------|-----------------|
| Development curve | $y_0 \times 10^{-2}$  | $a \times 10^{-2}$  | $b \times 10^2$ | $y_0 \times 10^{-2}$            | $a \times 10^{-2}$  | $b \times 10^2$ | $c \times 10^{-2}$ | $d \times 10^2$ |
| Coefficient value | 5.274                 | 17.10               | 5.840           | 0.0098                          | 9.612               | 5.840           | 7.4902             | 5.840           |
| R                 | < 0.0001              | 0.9963              | 0.9963          | < 0.0001                        | 1.0000              | 0.9991          | 1.0000             | 9.9991          |
| Dissipation curve | $y_0 \times 10^{-10}$ | $a \times 10^{-10}$ | $b \times 10^2$ | $y_0 \times 10^{-10}$           | $a \times 10^{-10}$ | $b \times 10^2$ | $f \times 10^6$    | g               |
| Coefficient value | < $10^{-5}$           | 0.00047             | $10^{-3}$       | −0.381                          | 3.8128              | 1.20            | 3.1233             | 0.0669          |
| R                 | < 0.0001              | 0.9963              | 0.9963          | < 0.0001                        |                     |                 |                    |                 |

### Procedures

#### Procedure S1. Determination of solubility constants of metal iodides [4].

Weighed portions of potassium iodide (0.2 g) and ascorbic acid (0.5 g) are placed into a 50-mL volumetric flask. The solution is diluted to the mark with doubly distilled deionized water. A 2-mL portion of this solution is mixed with 0.1 mL of 1 M sulfuric acid and, next, mixed with an aliquot portion of a test metal (copper(I), copper(II), lead(II), antimony(III), or tin(II)) solution, and the solution is diluted to 5 mL with doubly distilled deionized water. The thermal lens signal is measured after 10 min at 488.0 nm. The blank is carried out similarly, but without adding the test metal solution.

#### Procedure S2. Preparation of solutions $\text{Co}(\text{NO}_3)_2 \cdot 6\text{H}_2\text{O}$ .

To prepare the base solution No. 1, 5.00 g of cobalt sulfate hexahydrate  $\text{Co}(\text{NO}_3)_2 \cdot 6\text{H}_2\text{O}$  ( $M = 291.03 \text{ g/mol}$ ) was placed in a measuring flask of 50.0 mL, dissolved, diluted to the label with distilled water. Similarly, for the preparation of base solution No. 2, 20.00 g  $\text{Co}(\text{NO}_3)_2 \cdot 6\text{H}_2\text{O}$  was placed in a measuring flask of 50.0 mL. Base solutions with a concentration of 0.1 g/mL (0.344 mol/L) and 0.4 g/mL (1.374 mol/L), respectively, were prepared. Working solutions were prepared according to Table S3 in 2-mL Eppendorf polypropylene tubes.

**Table S3.** Compositions of working solutions  $\text{Co}(\text{NO}_3)_2 \cdot 6\text{H}_2\text{O}$ 

|                                            |      |      |      |      |      |      |      |      |
|--------------------------------------------|------|------|------|------|------|------|------|------|
| Volume of base solution No1, $\mu\text{L}$ | 100  | 200  | 300  | 400  | 500  | 600  | 700  | 800  |
| Water volume, $\mu\text{L}$                | 1900 | 1800 | 1700 | 1600 | 1500 | 1400 | 1300 | 1200 |
| Volume of base solution No1, $\mu\text{L}$ | 900  | 1000 | 1100 | 1200 | 1400 | 1600 | 1800 | 2000 |
| Water volume, $\mu\text{L}$                | 1100 | 1000 | 900  | 800  | 600  | 400  | 200  | 0    |
| Volume of base solution No2, $\mu\text{L}$ | 600  | 700  | 800  | 900  | 1000 | 1400 | 1800 | –    |
| Water volume, $\mu\text{L}$                | 1900 | 1800 | 1700 | 1600 | 1500 | 1400 | 1300 | –    |

#### Procedure S3. Preparation of gentian violet solutions.

To prepare the base solution, 50 mg of gentian violet,  $\text{C}_{25}\text{H}_{30}\text{N}_3\text{Cl}$  ( $M = 407.979 \text{ g/mol}$ ) was placed in a measuring flask of 50.0 mL, dissolved, the solution was diluted to the mark with distilled water, thus, a solution with a concentration of 1 mg/mL (2.451 mmol/L) was prepared. Working solutions were prepared according to Table S4 in 2-mL Eppendorf polypropylene tubes.

**Table S4.** Compositions of working solutions of gentian violet

|                                        |      |      |      |      |      |      |      |      |      |
|----------------------------------------|------|------|------|------|------|------|------|------|------|
| Volume of base solution, $\mu\text{L}$ | 1    | 5    | 10   | 20   | 30   | 40   | 50   | 60   | 70   |
| Water volume, $\mu\text{L}$            | 1999 | 1995 | 1990 | 1980 | 1970 | 1960 | 1950 | 1940 | 1930 |
| Volume of base solution, $\mu\text{L}$ | 80   | 90   | 100  | 120  | 140  | 180  | 200  | 220  | 260  |
| Water volume, $\mu\text{L}$            | 1920 | 1910 | 1900 | 1880 | 1860 | 1820 | 1800 | 1780 | 1740 |
| Volume of base solution, $\mu\text{L}$ | 300  | 400  | 500  | 600  | 700  | 800  | 900  | 1000 | 2000 |
| Water volume, $\mu\text{L}$            | 1700 | 1600 | 1500 | 1400 | 1300 | 1200 | 1100 | 1000 | 0    |

*Procedure S4. Preparation of ferroin solutions.*

To prepare the base solution, 50 mg of ferroin ( $M = 692.52$  g/mol) was placed in a measuring flask of 50.0 mL, dissolved, the solution was diluted to the mark with distilled water, thus, a solution with a concentration of 1 mg/mL (1.444 mmol/L) was prepared. Working solutions were prepared according to Table S5 in 2-mL Eppendorf polypropylene tubes.

**Table S5.** Compositions of ferroin working solutions

|                                        |      |      |      |      |      |      |      |      |      |      |      |      |
|----------------------------------------|------|------|------|------|------|------|------|------|------|------|------|------|
| Volume of base solution, $\mu\text{l}$ | 10   | 20   | 30   | 40   | 50   | 60   | 70   | 80   | 90   | 100  | 150  | 200  |
| Water volume, $\mu\text{l}$            | 1990 | 1980 | 1970 | 1960 | 1950 | 1940 | 1930 | 1920 | 1910 | 1900 | 1850 | 1800 |
| Volume of base solution, $\mu\text{l}$ | 250  | 300  | 350  | 400  | 450  | 500  | 550  | 600  | 650  | 700  | 750  | 800  |
| Water volume, $\mu\text{l}$            | 1750 | 1700 | 1650 | 1600 | 1550 | 1500 | 1450 | 1400 | 1350 | 1300 | 1250 | 1200 |

*Procedure S5. Preparation of nanodiamond solutions for spectrophotometric measurements.*

The base solution of nanodiamonds was prepared as given in [5,6]. If the age of the base solution was more than a day, then before preparing working solutions, the base solution was thoroughly mixed with intensive manual shaking and voiced in the bath for an hour. Then a series of working solutions was prepared according to Table S6 in 2-mL Eppendorf polypropylene tubes.

**Table S6.** Compositions of working solutions of nanodiamonds for spectrophotometric measurements

|                                        |      |      |      |      |      |      |      |      |      |      |
|----------------------------------------|------|------|------|------|------|------|------|------|------|------|
| Volume of base solution, $\mu\text{l}$ | 10   | 200  | 300  | 400  | 500  | 600  | 700  | 800  | 900  | 1000 |
| Water volume, $\mu\text{l}$            | 1900 | 1800 | 1700 | 1600 | 1500 | 1400 | 1300 | 1200 | 1100 | 1000 |
| Volume of base solution, $\mu\text{l}$ | 1100 | 1200 | 1300 | 1400 | 1500 | 1600 | 1700 | 1800 | 1900 | 2000 |
| Water volume, $\mu\text{l}$            | 900  | 800  | 700  | 600  | 500  | 400  | 300  | 200  | 100  | 0    |

*Procedure S6. Aqueous solutions of surfactants.*

For each test solution of surfactants at each concentration indicated in the second column, a series of 6 solutions containing the colored substance specified in the third column in the corresponding (column 4) concentration range was prepared (Table S7). The solutions were prepared in such a way that the sixth solution did not contain a colored substance, and in the remaining five its concentrations changed evenly over the specified range. All solutions were prepared in measuring flasks of 25 mL and brought to a mark at 20°C doubly distilled water. After homogenization in a Branson ultrasonic bath, 10 min were allowed to settle for 3 min. After making sure of the homogeneity of the solution, thermal-lens determination was carried out on spectrometer No. 1 at  $\lambda_e = 488.0$  nm (in the case of ammonium dichromate) and at  $\lambda_e = 514.5$  nm (in the case of tris). (2-nitroso-1-naphtholate) cobalt(III) at the excitation radiation power  $P_e = 40$  mW for 3–5 min, and also measured the optical density of all solutions at wavelengths of 488 nm and 514 nm respectively relative to surfactant solutions in doubly distilled water of the appropriate concentration.

**Table S7.** Concentration of working solutions of surfactants and colorants

| Surfactants            | Concentration, % wt.                         | Colorant                                                        | Colorant concentration range, mol/l                                              |
|------------------------|----------------------------------------------|-----------------------------------------------------------------|----------------------------------------------------------------------------------|
| Brij-35                | 0.25; 0.5; 0.75; 1.0; 1.5; 2.0; 2.5; 5.0; 10 | Ammonium dichromate; tris-(2-nitroso-1-naphtholate) cobalt(III) | $5 \cdot 10^{-5}$ – $4.2 \cdot 10^{-4}$<br>$3 \cdot 10^{-7}$ – $2 \cdot 10^{-5}$ |
| Triton-X100            | 0.25; 0.5; 1.0; 1.5; 2.0; 2.5; 5.0; 10       | Ammonium dichromate; tris-(2-nitroso-1-naphtholate) cobalt(III) | $5 \cdot 10^{-5}$ – $4.2 \cdot 10^{-4}$<br>$3 \cdot 10^{-7}$ – $2 \cdot 10^{-5}$ |
| Tween-80               | 0.25; 0.5; 1.0; 1.5; 2.0; 2.5; 5.0; 10       | Ammonium dichromate; tris-(2-nitroso-1-naphtholate) cobalt(III) | $5 \cdot 10^{-5}$ – $4.2 \cdot 10^{-4}$<br>$3 \cdot 10^{-7}$ – $2 \cdot 10^{-5}$ |
| Sodium dodecyl sulfate | 0.25; 0.5; 0.75; 1.0; 1.25; 1.5; 2.0; 2.5    | Ammonium dichromate                                             | $8 \cdot 10^{-5}$ – $9 \cdot 10^{-4}$                                            |

## References

1. Tishchenko, K.; Muratova, M.; Volkov, D.; Filichkina, V.; Nedosekin, D.; Zharov, V.; Proskurnin, M. Multi-wavelength thermal-lens spectrometry for high-accuracy measurements of absorptivities and quantum yields of photodegradation of a hemoprotein–lipid complex. *Arab. J. Chem.* **2017**, *10*, 781–791, doi:10.1016/j.arabjc.2016.01.009.
2. Shen, J.; Lowe, R.D.; Snook, R.D. A model for cw laser induced mode-mismatched dual-beam thermal lens spectrometry. *Chem. Phys.* **1992**, *165*, 385–396, doi:10.1016/0301-0104(92)87053-c.
3. Baesso, M.L.; Shen, J.; Snook, R.D. Time-resolved thermal lens measurement of thermal diffusivity of soda–lime glass. *Chem. Phys. Lett.* **1992**, *197*, 255–258, doi:10.1016/0009-2614(92)85764-2.
4. Chernysh, V.V.; Nesterova, I.V.; Proskurnin, M.A. The studies of the reaction of bismuth(III) with iodide at nanogram level by thermal lensing. *Talanta* **2001**, *53*, 1073–1082, doi:[https://doi.org/10.1016/S0039-9140\(00\)00603-2](https://doi.org/10.1016/S0039-9140(00)00603-2).
5. Usoltseva, L.O.; Volkov, D.S.; Karpushkin, E.A.; Korobov, M.V.; Proskurnin, M.A. Thermal Conductivity of Detonation Nanodiamond Hydrogels and Hydrosols by Direct Heat Flux Measurements. *Gels* **2021**, *7*, 248.
6. Proskurnin, M.A.; Usoltseva, L.O.; Volkov, D.S.; Nedosekin, D.A.; Korobov, M.V.; Zharov, V.P. Photothermal and Heat-Transfer Properties of Aqueous Detonation Nanodiamonds by Photothermal Microscopy and Transient Spectroscopy. *J. Phys. Chem. C* **2021**, *125*, 7808–7823, doi:10.1021/acs.jpcc.0c09329.
